# Supplementary material for: Low-temperature oxidative coupling of methane over LaCeZr ternary oxide supported Mn–Na2WO4
Source: Royal Society of Chemistry journal article supplement (doi:10.1039/d3cy00012e), 2023-01-01
Supplement: d3cy00012e1.pdf [file d3cy00012e1.pdf]

Supplementary Materials for

**Low-temperature oxidative coupling of methane over  
LaCeZr ternary oxides supported Mn-Na<sub>2</sub>WO<sub>4</sub>**

Junxing Wang<sup>†</sup>, Fangwei Liu<sup>†</sup>, Jianzhou Wu\*, Shihui Zou\*, Jie Fan\*

<sup>†</sup>These authors contribute equally to this work

\*Corresponding authors

Email: [jfan@zju.edu.cn](mailto:jfan@zju.edu.cn); [xueshan199@163.com](mailto:xueshan199@163.com); [wjzclig@zju.edu.cn](mailto:wjzclig@zju.edu.cn)

**This PDF file includes:**

Equations

Figure S1-S3

Table S1-S3

### Equations:

The CH<sub>4</sub> conversion and products selectivity were calculated based on a carbon atom basis of the inlet and outlet gases.

$$CH_4 \text{ Conv.} = \left( 1 - \frac{nCH_{4outlet}}{nCH_{4outlet} + \sum x \times n[products]_{outlet}} \right) \times 100\% \#(1)$$

where  $x$  is the number of carbon atom in the products.

The products selectivity was calculated on a carbon atom basis of the outlet products (i.e., C<sub>2</sub>H<sub>4</sub>, C<sub>2</sub>H<sub>6</sub>, CO, CO<sub>2</sub>, C<sub>3</sub>H<sub>6</sub> and C<sub>3</sub>H<sub>8</sub>). C<sub>2</sub> products include both C<sub>2</sub>H<sub>4</sub> and C<sub>2</sub>H<sub>6</sub>.

$$C_2 \text{ Sel.} = \frac{2 \times nC_2H_4 + 2 \times nC_2H_6}{2 \times nC_2H_4 + 2 \times nC_2H_6 + 1 \times nCO + 1 \times nCO_2 + 3 \times nC_3H_6 + 3 \times nC_3H_8} \times 100\% \#(2)$$

$$CO \text{ Sel.} = \frac{1 \times nCO}{2 \times nC_2H_4 + 2 \times nC_2H_6 + 1 \times nCO + 1 \times nCO_2 + 3 \times nC_3H_6 + 3 \times nC_3H_8} \times 100\% \#(3)$$

$$CO_2 \text{ Sel.} = \frac{1 \times nCO_2}{2 \times nC_2H_4 + 2 \times nC_2H_6 + 1 \times nCO + 1 \times nCO_2 + 3 \times nC_3H_6 + 3 \times nC_3H_8}$$

$$C_2 \text{ Yield} = CH_4 \text{ Conv.} * C_2 \text{ Sel.} * 100\% \#(5)$$

The following formula was used for the calculating of carbon balance, where  $x$  is the number of carbon atom in the products. Generally, a >95% carbon balance could be gained.

$$\text{Carbon balance} = \frac{nCH_{4outlet} + \sum x \times n[products]_{outlet}}{nCH_{4inlet}} \times 100\% \#(6)$$

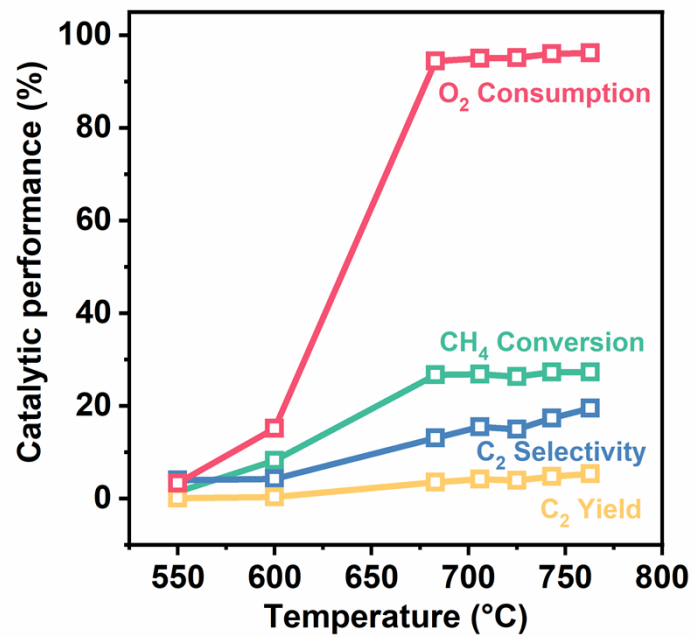

Figure S1. The catalytic performance of the LaCeZr support in OCM.

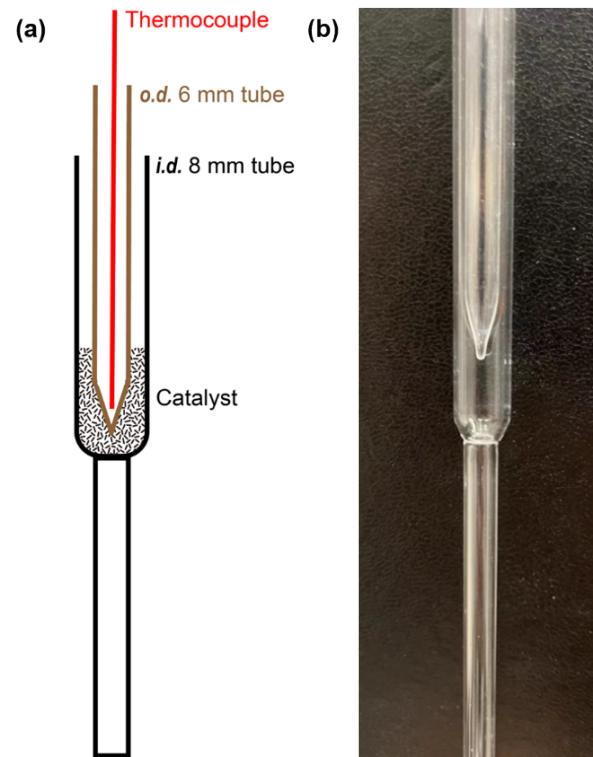

**Figure S2.** (a) The schematic diagram and (b) the photograph of the quartz fix-bed reactor.

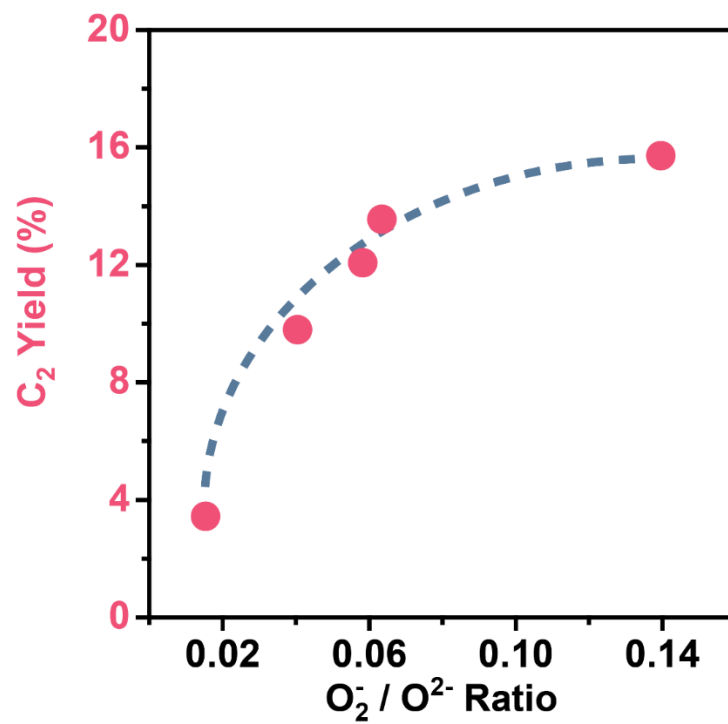

**Figure S3.**  $C_2$  yields as a function of  $O_2^- / O_2^{2-}$  ratio. Reaction conditions:  $T = 703 \pm ^\circ C$ ,  $CH_4 : O_2 = 5 : 1$ , total gas flow rate  $66 \text{ mL min}^{-1}$ .

**Table S1:** Catalytic performances of Mn-Na<sub>2</sub>WO<sub>4</sub>/LaCeZr with different CH<sub>4</sub>/O<sub>2</sub> ratio.

| <b>CH<sub>4</sub>/O<sub>2</sub><br/>ratio</b> | <b>T<br/>(°C)</b> | <b>CH<sub>4</sub> Conv.<br/>(%)</b> | <b>SC<sub>2</sub><br/>(%)</b> | <b>YC<sub>2</sub><br/>(%)</b> | <b>O<sub>2</sub> Conv.<br/>(%)</b> | <b>C<sub>2</sub>H<sub>4</sub>:C<sub>2</sub>H<sub>6</sub><br/>molar ratio</b> |
|-----------------------------------------------|-------------------|-------------------------------------|-------------------------------|-------------------------------|------------------------------------|------------------------------------------------------------------------------|
| 6                                             | 700               | 5.3                                 | 24.8                          | 1.3                           | 27.9                               | /                                                                            |
| 5                                             | 701               | 26.4                                | 59.4                          | 15.7                          | 98.5                               | 1.0                                                                          |
| 4                                             | 700               | 32.3                                | 58.5                          | 18.9                          | 98.0                               | 1.2                                                                          |
| 3                                             | 700               | 37.6                                | 55.4                          | 20.9                          | 98.5                               | 1.6                                                                          |

SC<sub>2</sub>: C<sub>2</sub> selectivity; YC<sub>2</sub>: C<sub>2</sub> yield.

Reaction conditions: CH<sub>4</sub>:O<sub>2</sub> varied from 6:1 to 3:1, total gas flow rate 66 mL min<sup>-1</sup>, GHSV 4,000 mL

h<sup>-1</sup> g<sub>cat</sub><sup>-1</sup>.

**Table S2.** Representative catalysts for low-temperature oxidative coupling of methane.

| Entry | T (°C) | Catalyst <sup>a</sup>                                                                                                 | GHSV <sup>b</sup> (mL g <sub>cat</sub> <sup>-1</sup> h <sup>-1</sup> ) | CH <sub>4</sub> :O <sub>2</sub> :X <sup>c</sup> | CH <sub>4</sub> Conv. (%) | SC <sub>2</sub> (%) | YC <sub>2</sub> (%) | Ref.             |
|-------|--------|-----------------------------------------------------------------------------------------------------------------------|------------------------------------------------------------------------|-------------------------------------------------|---------------------------|---------------------|---------------------|------------------|
| 1     | 660    | Mn <sub>2</sub> O <sub>3</sub> -Na <sub>2</sub> WO <sub>4</sub> /Ce <sub>0.15</sub> Zr <sub>0.85</sub> O <sub>2</sub> | 4000                                                                   | 5:1:0                                           | 25.0                      | 67.0                | 16.8                | [30]             |
| 2     | 680    | MnO <sub>x</sub> -Na <sub>2</sub> WO <sub>4</sub> /A-SiO <sub>2</sub>                                                 | 10000                                                                  | 5:1:0                                           | 23.0                      | 72.0                | 16.6                | [18]             |
| 3     | 650    | Mn <sub>2</sub> O <sub>3</sub> -TiO <sub>2</sub> -Na <sub>2</sub> WO <sub>4</sub> /SiO <sub>2</sub>                   | 8000                                                                   | 5:1:4                                           | 22.0                      | 62.0                | 13.6                | [17]             |
| 4     | 700    | TiO <sub>2</sub> -modified Mn <sub>2</sub> O <sub>3</sub> -Na <sub>2</sub> WO <sub>4</sub> /SiO <sub>2</sub>          | 8000                                                                   | 5:1:4                                           | 23.0                      | 73.0                | 16.8                | [32]             |
| 5     | 500    | La <sub>2</sub> O <sub>3</sub>                                                                                        | 36000                                                                  | 3:1:0                                           | 28.0                      | 40.0                | 11.2                | [33]             |
| 6     | 500    | Sr-La <sub>2</sub> O <sub>3</sub>                                                                                     | 72000                                                                  | 3:1:0                                           | 35.0                      | 47.0                | 16.5                | [34]             |
| 7     | 570    | La <sub>2</sub> O <sub>3</sub> /5NaWSi                                                                                | 20000                                                                  | 3:1:2.6                                         | 31.0                      | 34.2                | 10.6                | [35]             |
| 8     | 450    | La <sub>2</sub> O <sub>2</sub> CO <sub>3</sub>                                                                        | 30000                                                                  | 3:1:0                                           | 30.2                      | 48.5                | 14.7                | [36]             |
| 9     | 550    | La <sub>2</sub> Ce <sub>2</sub> O <sub>7</sub>                                                                        | 18000                                                                  | 4:1:5                                           | 28.0                      | 52.0                | 14.6                | [37]             |
| 10    | 375    | La <sub>0.8</sub> Ce <sub>0.2</sub> O <sub>1.5+δ</sub>                                                                | 30000                                                                  | 3:1:0                                           | 29.2                      | 43.0                | 12.6                | [38]             |
| 11    | 720    | Li/MgO                                                                                                                | -                                                                      | 2:1:0                                           | 37.8                      | 50.3                | 19.0                | [39]             |
| 12    | 500    | Sm <sub>2</sub> O <sub>3</sub>                                                                                        | 72000                                                                  | 3:1:0                                           | 28.0                      | 42.0                | 11.8                | [40]             |
| 13    | 500    | Sr-Sm <sub>2</sub> O <sub>3</sub>                                                                                     | 72000                                                                  | 3:1:0                                           | 29.0                      | 48.0                | 13.9                | [40]             |
| 14    | 720    | LiCa <sub>2</sub> Bi <sub>3</sub> O <sub>4</sub> Cl <sub>6</sub>                                                      | -                                                                      | 2:1:7                                           | 41.7                      | 46.5                | 19.4                | [41]             |
| 15    | 710    | Mn-Na <sub>2</sub> WO <sub>4</sub> /ZrCeLa                                                                            | 4000                                                                   | 3:1:0                                           | 37.6                      | 55.4                | 20.9                | <i>This work</i> |

<sup>a</sup>Elemental compositions of the catalysts. <sup>b</sup>Gas hourly space velocity. <sup>c</sup>CH<sub>4</sub>/O<sub>2</sub>/balance (N<sub>2</sub>, He, or Ar in the corresponding references).

**Table S3:** Catalytic performances of Mn-Na<sub>2</sub>WO<sub>4</sub>/LaCeZr with different La ratio in support.

| <b>La ratio</b> | <b>T<br/>(°C)</b> | <b>CH<sub>4</sub> Conv.<br/>(%)</b> | <b>SC<sub>2</sub><br/>(%)</b> | <b>YC<sub>2</sub><br/>(%)</b> | <b>O<sub>2</sub> Conv.<br/>(%)</b> | <b>C<sub>2</sub>H<sub>4</sub>:C<sub>2</sub>H<sub>6</sub><br/>molar ratio</b> |
|-----------------|-------------------|-------------------------------------|-------------------------------|-------------------------------|------------------------------------|------------------------------------------------------------------------------|
| La = 0          | 700               | 20.6                                | 47.5                          | 9.8                           | 96.3                               | 0.6                                                                          |
| La = 0.5        | 700               | 21.0                                | 57.4                          | 12.1                          | 95.8                               | 0.7                                                                          |
| La = 1.0        | 701               | 26.4                                | 59.4                          | 15.7                          | 98.5                               | 1.0                                                                          |
| La = 2.0        | 706               | 23.5                                | 57.6                          | 13.5                          | 97.6                               | 0.8                                                                          |
| La = 4.0        | 699               | 8.0                                 | 43.0                          | 3.4                           | 15.6                               | /                                                                            |

SC<sub>2</sub>: C<sub>2</sub> selectivity; YC<sub>2</sub>: C<sub>2</sub> yield.

Reaction conditions: CH<sub>4</sub>:O<sub>2</sub> = 5:1, total gas flow rate 66 mL min<sup>-1</sup>, GHSV 4,000 mL h<sup>-1</sup> g<sub>cat</sub><sup>-1</sup>.



## References :

- [30] W. Sun, Y. Gao, G. Zhao, J. Si, Y. Liu, Y. Lu, Mn<sub>2</sub>O<sub>3</sub>-Na<sub>2</sub>WO<sub>4</sub> doping of Ce<sub>x</sub>Zr<sub>1-x</sub>O<sub>2</sub> enables increased activity and selectivity for low temperature oxidative coupling of methane, *J. Catal.*, 400 (2021) 372-386.
- [18] J. Si, G. Zhao, W. Sun, J. Liu, C. Guan, Y. Yang, X.R. Shi, Y. Lu, Oxidative coupling of methane: Examining the inactivity of the MnO<sub>x</sub>-Na<sub>2</sub>WO<sub>4</sub>/SiO<sub>2</sub> catalyst at low temperature, *Angew. Chem. Int. Ed.*, 61 (2022) e202117201.
- [17] P. Wang, G. Zhao, Y. Wang, Y. Lu, MnTiO<sub>3</sub>-driven low-temperature oxidative coupling of methane over TiO<sub>2</sub>-doped Mn<sub>2</sub>O<sub>3</sub>-Na<sub>2</sub>WO<sub>4</sub>/SiO<sub>2</sub> catalyst, *Sci Adv*, 3 (2017) e1603180.
- [32] P. Wang, X. Zhang, G. Zhao, Y. Liu, Y. Lu, Oxidative coupling of methane: MO<sub>x</sub>-modified (M = Ti, Mg, Ga, Zr) Mn<sub>2</sub>O<sub>3</sub>-Na<sub>2</sub>WO<sub>4</sub>/SiO<sub>2</sub> catalysts and effect of MO<sub>x</sub> modification, *Chin. J. Catal.*, 39 (2018) 1395-1402.
- [33] P. Huang, Y. Zhao, J. Zhang, Y. Zhu, Y. Sun, Exploiting shape effects of La<sub>2</sub>O<sub>3</sub> nanocatalysts for oxidative coupling of methane reaction, *Nanoscale*, 5 (2013) 10844-10848.
- [34] J. Song, Y. Sun, R. Ba, S. Huang, Y. Zhao, J. Zhang, Y. Sun, Y. Zhu, Monodisperse Sr-La<sub>2</sub>O<sub>3</sub> hybrid nanofibers for oxidative coupling of methane to synthesize C<sub>2</sub> hydrocarbons, *Nanoscale*, 7 (2015) 2260-2264.
- [35] S. Zou, Z. Li, Q. Zhou, Y. Pan, W. Yuan, L. He, S. Wang, W. Wen, J. Liu, Y. Wang, Y. Du, J. Yang, L. Xiao, H. Kobayashi, J. Fan, Surface coupling of methyl radicals for efficient low-temperature oxidative coupling of methane, *Chin. J. Catal.*, 42 (2021) 1117-1125.
- [36] Y. Hou, W. Han, W. Xia, H. Wan, Structure sensitivity of La<sub>2</sub>O<sub>2</sub>CO<sub>3</sub> catalysts in the oxidative coupling of methane, *ACS Catal.*, 5 (2015) 1663-1674.
- [37] Y. Zhang, J. Xu, X. Xu, R. Xi, Y. Liu, X. Fang, X. Wang, Tailoring La<sub>2</sub>Ce<sub>2</sub>O<sub>7</sub> catalysts for low temperature oxidative coupling of methane by optimizing the preparation methods, *Catal. Today*, 355 (2020) 518-528.
- [38] R. Feng, P. Niu, B. Hou, Q. Wang, L. Jia, M. Lin, D. Li, Synthesis and characterization of the flower-like LaCe<sub>1-x</sub>O<sub>1.5+</sub> catalyst for low-temperature oxidative coupling of methane, *J Energy Chem*, 67 (2022) 342-353.
- [39] K. Kwapien, J. Paier, J. Sauer, M. Geske, U. Zavyalova, R. Horn, P. Schwach, A. Trunschke, R. Schlogl, Sites for methane activation on lithium-doped magnesium oxide surfaces, *Angew Chem Int Ed*

Engl, 53 (2014) 8774-8778.

[40] B. Fu, T. Jiang, Y. Zhu, Structural effect of one-dimensional samarium oxide catalysts on oxidative coupling of methane, *J. Nanosci Nanotechnol.*, 18 (2018) 3398-3404.

[41] J.M. Thomas, W. Ueda, J. Williams, K.D.M. Harris, New families of catalysts for the selective oxidation of methane, *Faraday Discuss. Chem. Soc.*, 87 (1989) 33-45.
